# Supplementary material for: Controlling the magnetic and optical responses of a MoS2 monolayer by lanthanide substitutional doping: a first-principles study
Source: Royal Society of Chemistry journal article supplement (doi:10.1039/c7cp03160b), 2017-01-01
Supplement: c7cp03160b1.pdf [file c7cp03160b1.pdf]

## Supplementary material

### Controlling the magnetic and optical response of MoS<sub>2</sub> monolayer by lanthanide substitutional doping: a first-principles study

Cecil N. M. Ouma<sub>a</sub>, Sobhit Singh<sup>†</sup><sub>b</sub>, Kingsley O. Obodo<sub>c</sub>, George O. Amolo<sub>d</sub> and Aldo H. Romero<sup>‡</sup><sub>b</sub>

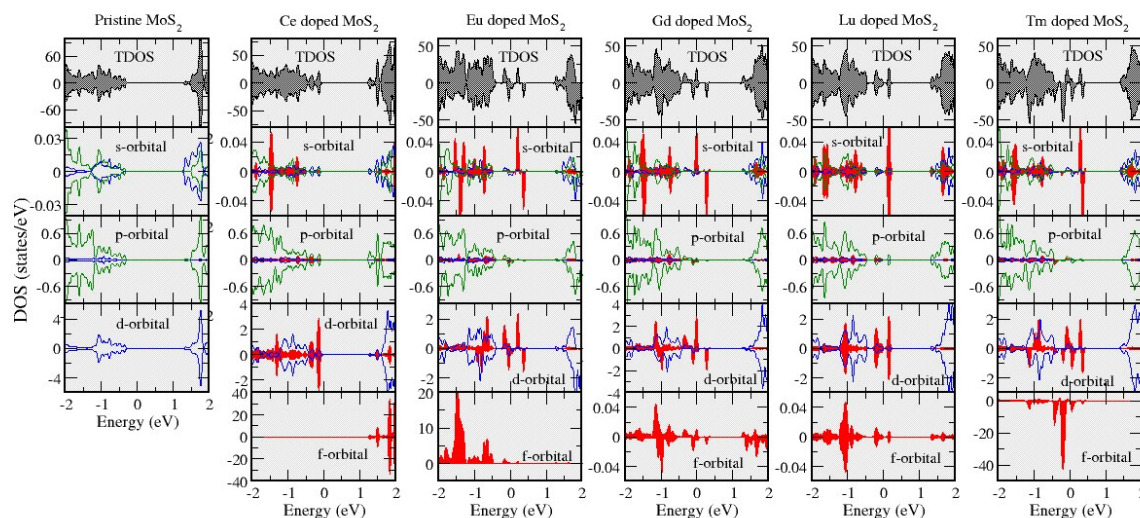

**S 1:** Calculated PDOS for pristine and doped systems. The Blue, Green and Red lines represents the Mo, S and dopant orbitals respectively

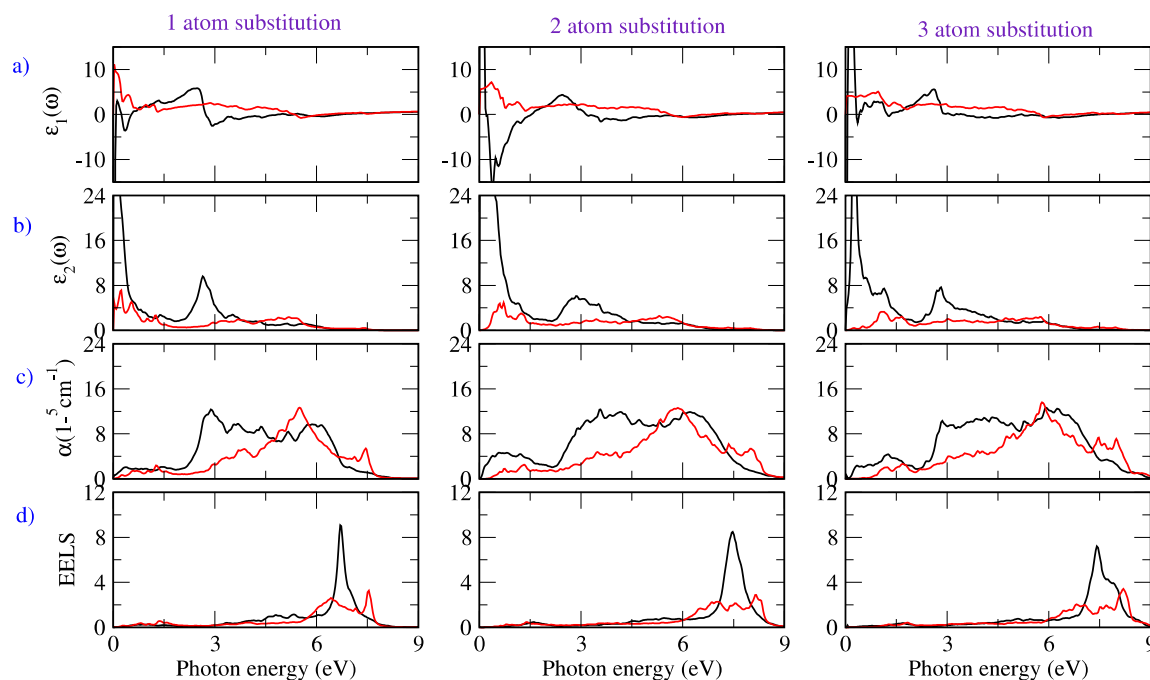

**S 2:** Calculated optical properties of Tm doped MoS<sub>2</sub> monolayer at 1, 2 and 3 atom substitutional doping for E-field polarization parallel to the xy-plane (black line), and

perpendicular to the xy-plane (red line). Panels a), b), c) and d) presents the spectra for real part of the dielectric function, imaginary part of the dielectric function, absorption co-efficient, and the EELS respectively.
